# Supplementary material for: A Multimethod Approach towards Assessing Urban Flood Patterns and Its Associated Vulnerabilities in Singapore
Source: Hindawi journal article supplement (doi:10.1155/2016/7159132), 2016-01-01
Supplement: f1 [file 7159132.f1.docx]

Table S1: Database of flood events reported in *The Straits Times* archives using the search term “flood+Singapore.” *Rows containing* *flash flood events are italicised.*

| **Date** | **Location (if specifically reported in article)** | **Climate observations** | | | **Impacts** | | |
| --- | --- | --- | --- | --- | --- | --- | --- |
| **Rainfall reported in media article (total)** | **3-hourly precipitation recorded at Changi Station (mm; time)** | **Monsoon type (NE = Northeast SW = Southwest ITM = Intermonsoon)** | **General reported impacts** | **Maximum reported flood depth** | **Reported human casualties/ injuries** |
| December 1892 |  | 235.71mm (24hrs) |  | NE |  |  |  |
| 23-27 September 1904 | Chinatown, Race Course, Orchard, Tanglin, Bukit Timah, | Tanglin 4th day - 182.63mm (24h) Kandang Kerbau Hospital – 187.198mm (24h) | NA | ITM | Damaged houses and property |  |  |
| 31 October 1921 | Low-lying area |  | NA | ITM |  |  |  |
| 1 January 1923 |  |  | NA | NE |  |  |  |
| 31 August 1929 | Tanglin, Orchard, Somerset | 2.452mm (24hrs) | NA | SW | Stranded cars |  |  |
| 1 May 1932 |  |  | NA | ITM |  |  |  |
| 9 July 1932 | Geylang, River Valley |  | NA | SW |  | 1.5 m |  |
| 30 November 1932 | Jalan Besar |  | NA | NE |  |  | A child drowned when swept into the drain |
| 6-7 July 1933 | Orchard, Bukit Timah , Selegie | 6th morning – 12.7mm  6th afternoon – 9.652mm (1h) at Mount Faber  6th afternoon – > 38.1mm (1h) Central Singapore | NA | SW |  | 0.3 m |  |
| 5 January 1934 | Tanglin, Newton Circus, Bukit Timah, Thomson | 157.48mm (1 day) | NA | NE | Hockey and rugby matches between Singapore and Malaya were cancelled Telephones were cut off | 0.9 m | People were stranded at homes |
| 8 March 1935 | Tanjong Rhu, Market Street, central Singapore |  | NA | ITM |  | Ankle-deep |  |
| 22 March 1936 | Tanglin, Bukit Timah | Botanic gardens – 80.264mm (40min) Seletar - 1.31 points Kallang - 79 points Bukit Timah Golf Course - 60.96mm (40min) | NA | ITM | Flooding of roads and houses  Dislocation of telephone system  Traffic jams reported Fallen trees |  |  |
| 18 December 1937 | "Suburbs" | 3hr storm | NA | NE | Vehicles were stranded | 0.3 m |  |
| 6 September 1939 | Selegie Road, Grove Estate, low lying districts | 114.3mm (2h squall) | NA | SW | Traffic jams reported Uprooted trees | 0.7 m |  |
| 14-15 December 1939 | Orchard, Grove Estate, Katong, Geylang Serai | Killing – 191.008mm Bukit Timah – 195.58mm | NA | NE | Houses were flooded and people had to be evacuated |  | Flood waters trapped people in their houses |
| 16 December 1939 |  |  | NA | NE |  |  |  |
| 2 September 1946 | Orchard |  | NA | ITM |  |  |  |
| 30 January 1948 | Bukit Timah, Thomson Road | Tengah Airfield – 139.446mm Kallang Meteorological station – 97.282mm 38.1mm (1h from 5 to 6pm) | NA | NE | Traffic jams reported Stalled vehicles |  | Stranded workers at offices |
| 20 March 1948 | Napier Road |  | NA | ITM | Semi-submerged cars Mile long traffic jam (“biggest traffic jam of the year”) Stalled vehicles |  |  |
| 21 March 1948 | Bukit Timah, Orchard |  | NA | ITM | Orchard Road shops and houses were flooded Fallen trees | 0.3 m |  |
| 11 November 1949 | Orchard (potentially other areas) |  | NA | NE |  | Knee-deep |  |
| 13-14 January 1951 | Kim Keat Road, Potong Pasir, Orchard, Bukit Timah, Stevens, Balmoral, Dunearn, Balestier, Thomson, Havelock, Alexander Rd | Kallang – 111 mm (30hrs continuous rainfall) | NA | NE | Flooded houses – property damaged/destroyed Stalled vehicles Landslide at River Valley Road Affected telephone lines | 1.2 m | People were swept into the monsoon drain and drowned 300 marooned families |
| 19-20 January 1951 | Bukit Timah, Orchard, Alexandra, Tiong Bahru, Holland Rd, Keppel Harbour Rd | 68.834mm (21hrs of continuous rain) | NA | NE | Landslide at River Valley Road |  |  |
| 27 February 1954 | Rochor, Thomson, Balestier, Orchard, Farrer | 76mm | NA | NE |  | 1.2 m |  |
| 2 June 1954 | Tanglin, Bukit Timah, Mountbatten, within city | 116.332mm (5h storm) | NA | SW | Stranded cars |  |  |
| 17 June 1954 | Orchard, Kallang Airport, part of Bukit Timah Road | 88.138mm (5h storm) | NA | SW | Planes diverted to Changi from Kallang | 0.5 m |  |
| 30 September 1954 | River Valley | 45.212mm | NA | ITM | Stalled vehicles |  |  |
| 23 October 1954 | Orchard | Kallang – 101.6mm (2.5h) | NA | ITM | Flights at Kallang Airport was halted  Stalled vehicles | 0.3 m |  |
| October to December 1954 | Tengah and Paya Lebar | Lasted for 4 days. | NA |  | Delayed flights |  | 10 000 people affected, 5000 people homeless |
| 9 December 1954 | Bedok (worst hit), Bukit Timah, Grove Estate, Orchard Road, Telok Ayer, Cecil Road, Anson Road | Almost 2 days of continuous rainfall | NA | NE | “Thousands of dollars” in property damage (houses and agriculture) | 1.8 m | 2,500 people were displaced from Bedok settlement |
| 11/12 January 1955 | Tanjong Rhu, Marine Parade |  | NA | NE |  | Knee-deep |  |
| 20-22 January 1955 | Bedok | 72h stretch of continuous rain | NA | NE |  |  |  |
| 28 January 1955 | Orchard | Kallang – 71.12 (5.25h) | NA | NE | Traffic jams reported | 0.6 m |  |
| 25 July 1955 |  | 109.728 (total storm) 50.8mm (1h from 4 to 5am) | NA | SW | Minor traffic accidents Diversion of traffic |  |  |
| 18 July 1956 | Orchard, Bukit Timah, Thomson, Tanjong Pagar, Chinatown, University of Malaya | 23.114mm (5.5h) | NA | SW | An uprooted tree Traffic jams reported | 0.2 m |  |
| 12 June 1958 | Bukit Timah, Orchard, Dunearn |  | NA | SW | Flooded kitchens and gardens in certain areas at Stevens and Cuscaden Roads Traffic jams and stalled vehicles reported | 0.9 m |  |
| 29 August 1958 | Orchard | Paya Lebar – 82.55mm | NA | SW | Traffic jams reported |  |  |
| 24 March 1959 | Bukit Timah |  | NA | ITM |  | 0.3 m |  |
| 14 July 1959 |  |  | NA | SW |  |  |  |
| 26 June 1959 |  |  | NA | SW |  |  |  |
| 24 October 1959 | Bukit Timah, Woodlands, Alexandra, Orchard, Kampong Bahru, Chinatown | 0.508mm (2.5h) | NA | ITM | Affected businesses started late as people were stranded Traffic jams reported and stalled vehicles | 0.1 m |  |
| 7 December 1959 | Bukit Timah |  | NA | NE |  |  |  |
| 4 June 1960 | Bukit Timah |  | NA | SW |  |  |  |
| 19 November 1961 | Braddell, Changi, Bukit Timah, Orchard, Thomson, Geylang | Paya Lebar Airport – 58.42mm | NA | NE | Tree fall from lightning strike |  |  |
| 1 April 1962 | Chinatown | 10.668mm | NA | ITM | Flooded shops Traffic Jams reported |  |  |
| 13 November 1963 | Telok Blangah, Nelson Road, | Paya Lebar – 42.926mm (3h rainfall) | 0.3;0000 | NE | Power failure Traffic jams reported |  |  |
| 19 November 1963 | Several low-lying areas |  | NA | NE |  |  |  |
| 23 December 1963 |  |  | 0.3;0000 | NE |  |  |  |
| 28 January 1964 | Low-lying area | 2h heavy rain | NA | NE |  |  |  |
| 12 June 1964 | Bukit Timah, Orchard, Chinatown, Alexandra, Tiong Bahru, Queensway | 46.736mm (2.5h) 88.138mm (38h) | 38.0;0000, 8.0;0000 | SW | Traffic Jams reported | 0.9 m | 20 families had to move out of their homes |
| 2 October 1966 | Several districts including Bukit Timah | 27.94mm | NA | ITM | Stall vehicles reported | Knee-high |  |
| 31 May 1969 |  |  |  | ITM |  |  |  |
| 11 November 1969 |  |  |  | NE |  |  |  |
| 10-13 December 1969 (Hari Raya holidays) | Telok Blangah |  | NA | NE | Flights, telephone, electricity, drowning, livestock swept away, 3000 evacuated and homeless.  Rail between Singapore and Malaysia severed Landslides and fallen trees reported | 2.5 m | 5 dead |
| 11 December 1969 |  | 467mm (17h) | NA | NE | 3000 people lost their homes. S$4.3 million damage at 1969 value |  |  |
| 23/4 September 1971 | Bukit Timah, Whitley, Geylang Serai, Thomson, Braddell, Clementi, Dunearn, Holland | 58.4 (2h storm)  Seletar - 1.13mm Pierce - 1.72mm | NA | ITM-Sumatra | Power failure Plane delays Traffic Jams reported  Landslides reported | 0.5 m |  |
| 22 April 1972 | Upper Thomson |  | NA | ITM | Traffic Jams reported |  |  |
| 10 January 1973 | Potong Pasir, Marsiling, Tanjong Pagar | 57.404mm | NA | NE |  | 0.3 m | 250 people flee Kampong (residence) of Marsiling Road |
| 3 May 1973 | Balmoral Road, Bukit Timah, Braddell, Dunearn, Robinson, Outram, Changi | Paya Lebar - 3mm  3h storm | NA | ITM | Traffic Jams reported |  | Workers stranded at work |
| 4 August 1973 | Sembawang Road, Braddell Road, 10th Mile, Tampines Road, Norfolk Road, Serangoon Road | 71.12mm | NA | SW | Traffic Jams reported | 0.9 m |  |
| 20 October 1973 |  |  | NA | ITM |  |  |  |
| 9 February 1974 | Low lying areas in the city, East Coast, Collier Quay, Kampong Bahru, Towner Road, Chinatown | No rain | NA | ITM | Traffic Jams reported  “Thousands of dollars” of property was damaged | 1.5 m |  |
| 19 April 1974 |  |  | NA | ITM |  |  |  |
| 29 April 1974 | Bukit Timah, Newton Circus, Balmoral Road, Kampong Java, Steven, Braddell, Farrer Park | 68.3mm - (4h) | NA | ITM | Traffic Jams reported | 0.5 m |  |
| 10 March 1976 | Thomson, Upper Thomson, Whitley | 2hrs thunderstorm 128mm rainfall at 4 reservoirs Hail stones reported | NA | ITM | Traffic Jams reported Fallen trees blocked roads and caused property damage |  |  |
| 1 December 1976 | Bras Basah, Orchard, Anson, Robinson, Stevens | Paya Lebar – 3.3mm Tengah – 5.5mm Seletar Base – 3.1mm | NA | NE | Minor traffic jam reported |  |  |
| 28 August 1977 |  |  | NA | ITM |  |  |  |
| 4 November 1977 | Heaviest in central & city areas | Paya Lebar -11mm Seletar – 1.9mm Tengah – 1.1mm Changi – 5.8mm | NA | NE | Stalled vehicles |  |  |
| 10, 11 November 1978 |  | Paya Lebar - 75mm | NA | NE |  |  |  |
| 2, 3 December 1978 | Woodlands Braddell, Potong Pasir, Changi, Bukit Timah, Thomson | 512mm (2nd- 24 hour) | NA | NE | 1000 people evacuated, disrupted electricity and telephone, $10 million damages ($5.75 million at 1978 value). 2000 pigs died. Landslides reported; 50 roads were sealed off |  | 7 dead |
| 17 April 1979 |  |  | NA | ITM |  |  |  |
| 7 November 1979 | Balestier, Thomson, Lorong Chuan, Geylang | 0.5mm in 2hrs | NA | NE | No impact except water level was 0.2mm in affected areas. |  |  |
| 19/20 January 1980 | Bukit Timah, Tampines, Yio Chu Kang, Eunos, Serangoon, Katong, Meyappan Chettiar Road, Mountbatten Road, Newton, Woodlands | 2 days of continuous rain | NA | NE |  | 1.3 m |  |
| 5/6 May 1980 | Chua Chu Kang, Lim Chu Kang, Jurong, Pasir Ris, Orchard, Tiong Bahru, Thomson, Braddell, Newton Circus, Alexandra, Kampung Kapor |  | NA | ITM - Sumatra | Traffic Jams and road diversions reported Landslide reported at construction site | 0.6 m |  |
| 11 August 1980 |  |  | NA | SW |  |  |  |
| 15 November 1980 |  |  | NA | NE |  |  |  |
| 20 July 1981 |  |  | 22.0;0000 | SW |  |  |  |
| 30 July 1981 | Newton Circus, Dorset Road, Towner Road |  | 3.0;0600, 3.0;0000 | SW |  | 0.6 m |  |
| 11 March 1982 | Bukit Timah |  | 2.0;1200, 2.0;000 | ITM | Stalled vehicles reported |  |  |
| 18 March 1982 | Bukit Timah | Heavy rainfall | 62.0;0000, 1.0;0600 | ITM |  | 1.5 m |  |
| 14 April 1982 | Bukit Timah |  | 7.0;0600, 1.0;1200, 8.0;0000 | ITM | Traffic Jams and stalled vehicles reported  Stranded school kids | 1 m |  |
| 24 April 1982 | Orchard and others | Heavy rain | 0.2;0000, 10.0;1200 | ITM | Traffic Jams reported |  |  |
| 2 September 1982 | Margaret Drive, Henderson Road, Tanglin, Bukit Merah, Alexandra, Scotts, Avenue 8, Ang Mo Kio | Changi – 19mm  3h storm | NA | ITM | Traffic Jams and fallen tree reported |  |  |
| 1 December 1982 |  | By 25 December, 20 rainy days. Paya Lebar - 371mm | NA | NE | Traffic Jams reported  Cave-in at Sembawang Road Damage to road surface at Beach Road |  |  |
| 9 May 1983 | Jurong, Bukit Timah | Seletar - 70.2mm Changi - 31mm Tengah - 36.4mm | 19.0;0000, 32.0;1200,  0.1;1800 | ITM | Traffic Jams reported | 0.3 m |  |
| 14 August 1983 |  | Heavy rain | 9.0;0300 | SW | Many fallen trees reported |  |  |
| 22 August 1983 | Changi Airport | Changi – 178.1mm (2h) | 182.0;1200 | SW | Carpark at the airport was flooded |  |  |
| 10 September 1983 |  | 60.9mm (3h) | 5.0;0300, 50.0;0900 | ITM | Traffic Jams reported |  | 13 traffic accidents |
| 10 December 1983 | Serangoon |  | 48.0;0000, 1.0;1800 | NE | Flooded houses | 1 m |  |
| 24-26 December 1983 |  | Changi – 164.4mm | 8.0;1200, 3.0;1800 12.0;0000, 7.01200, 35.0;2100, 164.0;0000, 23.0;0600, 7.0;1200, 42.0;0000 | NE | Stalled vehicles due to damp electrical systems |  |  |
| *1-2 February 1984* | *Changi, Tampines, Bukit Timah, Airport Road* | *Changi - 154.4mm (24h - 1st day) Changi - 17.1mm (24h - 2nd day) Up to 2h of rain* | *31.0;0000, 1.0;1800, 17.0;0000* | *ITM* | *Lunar New Year travel was affected Flooded houses Traffic jams and stalled vehicles reported* | *Knee-deep* | *Traffic accidents common* |
| February 1984 | Chinatown, around Singapore River, Boat Quay, Lorong Telok, Canton Street, South Canal Road | 20 days of rain Changi - 400mm to 460mm Southern Singapore - 270mm to 300mm | NA | ITM | Vegetable farmers lost crops as they rotted or were washed away Rough seas resulted in fewer fishes caught  Delayed construction projects as many sites were flooded  Drop in business throughout Singapore  Stalled vehicles reported |  |  |
| *2/3 March 1984* | *Lim Chu Kang, Bukit Timah* | *112.1mm rain over 12 hrs Up to 2h of rain* | *0.5;1200, 119.0;0300, 5.0;0600* | *ITM* | *Worst flood in 15 years  Delayed exam in NUS Power failure throughout Singapore Fish farms were affected Massive traffic jams, landslides common in Depot Road area, numerous fallen trees* |  |  |
| *16 April 1984* |  | *Up to 2h of rain* | *21.0;0000, 15.0;0600* | *ITM* | *Minor floods* |  |  |
| *19 April 1984* |  | *Up to 2h of rain* | *19.0;0000, 1.00600, 1.0;1500* | *ITM* | *Minor floods* |  |  |
| 25 April 1984 |  |  | NA | ITM |  |  |  |
| *7 May 1984* |  | *Up to 2h of rain* | *16.0;0000, 7.0;12000, 1.0;1800* | *ITM* | *Minor floods* |  |  |
| *15 May 1984* | *Bukit Timah, Tanglin* | *Up to 2h of rain* | *5.0;0900* | *ITM* |  | *0.6 m* |  |
| *21 May 1984* | *Chinatown, Alexandra, Balmoral, Orchard, Redhill, Tanglin, Holland Road, Farrer (14 areas flooded)* | *Orchard Road – 130mm (100min) Up to 2h of rain Botanic gardens - 130mm (2h)* | *0.1;0300, 0.3;1200* | *ITM* | *Traffic jams reported* | *1 m* |  |
| *25 May 1984* |  | *Up to 2h of rain* | *25.0;0600, 2.0;1200* | *ITM* |  |  |  |
| *27 May 1984* | *Bukit Merah, Bukit Timah, Commonwealth, Tanglin, Serangoon* | *Up to 2h of rain* | *14.0;0000, 20.0;0600, 3.0;1200* | *ITM* | *Houses were flooded; uprooted trees* | *0.6 m* | *162 calls to help with cars broken down by floods* |
| 1 June 1984 | Braddell, Stevens, Ang Mo Kio, Toa Payoh, Thomson | 3hr rainfall | 44.0;0000 | SW | 1 tree uprooted | 0.75 m |  |
| *5 June 1984* | *Pasir Ris, Tampines, Changi, Upper Serangoon, Ang Mo Kio, Bedok* | *167mm rain fall over 5 days  Up to 2h of continuous rain* | *2.0;0000, 120.0;0600, 1.0;1200* | *SW* | *Several thousand dollars of damage – fish farm & houses* | *1 m* |  |
| 30 August 1984 | South and East Coast | 2h rainfall 0.2 to 1.8mm (most of it over sea) | 0.5;0000 | SW | Sunk boats & uprooted trees reported 30 areas were hit by power failure |  |  |
| 19 September 1984 | Bukit Timah, Dunearn, Farrer Road, Whitley Roads, Thomson, Braddell | 6hr rainfall | 16.0;0000, 3.0;0600 | ITM | Traffic jams reported |  |  |
| 28 September 1984 | Lim Chu Kang, Bukit Timah, Dunearn | Choa Chu Kang – 149mm Paya Lebar -13mm Changi - 21mm | 21.0;0000, 2.0;1800 | ITM-Sumatra |  | 0.5 m |  |
| 27 October 1984 | Bukit Timah, Kim Seng | Storm/lightning 33-65mm | 31.0;0000, 5.0;1800 | ITM | Traffic jams reported |  | 2 car accidents |
| 18 December 1984 | Braddell, Upper Thomson, Bartley, Upper Paya Lebar, Marine Parade, Woodlands |  | 7.0;1200, 49.0;1800 | NE |  |  | Minor road accidents |
| 29 January 1985 |  | Bad weather conditions | 13.0;0600, 24.0;1200, 0.5;1800 | NE | A tree almost fell on a car |  |  |
| 12 February 1985 | Braddell, Upper Bukit Timah |  | 1.0;0000, 0.5;0600, 12.0;1200 | ITM | Traffic jams reported | 0.35 m |  |
| 31 March 1985 | Bukit Timah |  | 11.0;0000 | ITM | Traffic jams reported |  |  |
| 13 April 1985 | Bukit Timah, Adam Road, Dunearn Road, Changi |  | 20.0;0000, 3.0;1200 | ITM | 13 uprooted trees | 1 m |  |
| 8 May 1985 |  |  | NA | ITM |  | 0.3 m |  |
| 21 May 1985 | Tanjong Katong, Choa Chu Kang, Balestier, Balmoral, Waterloo, Stevens, Dunearn, Dunman | Jurong Waterworks – 155.6mm rain | 5.0;0000, 3.0;0600, 2.0;1200 | ITM Slow moving Sumatra | Exams were delayed due to flooded schools Power failure and traffic jams reported |  |  |
| 13 July 1985 | Bukit Timah, Jurong, Choa Chu Kang, Commonwealth |  | 30.0;0600, 2.0;1200 | SW - Sumatran squall type storm |  | 0.6 m | 11 traffic accidents |
| 18 July 1985 | Bukit Timah, Newton, King’s Road, Adam Road, Newton Circus, Scotts, Dunearn | Seletar - 41mm | 26.0;0600, | SW-Sumatra squall | Floods hit roads and houses; traffic jams reported | 0.8 m | Women almost drowned when she was swept into the canal |
| 11 September 1985 | Outram, Tiong Bahru, River Valley, Havelock, New Bridge, Stirling, Scotts, Newton, Ayer Rajah, Orchard, Commonwealth, Bukit Timah, Tiong Bahru | 2hr rainfall, Orchard -142.3mm, | 5.0;0000, 20.0;1800 | ITM | 2m hole in slip road connection Scotts and Orchard Traffic jams and 3 fallen trees Flooded shops in the basement of Orchard Road | 0.45 m | 5 accidents with 6 people hurt |
| 9 January 1986 |  | Changi - 95.6mm | NA | NE | Traffic jams reported |  |  |
| 8 March 1986 | Boon Lay, Stagmont, parts of Woodlands, Chao Chu Kang, Jurong, Lim Chu Kang, Bukit Timah, Dunearn |  | 9.0;0000, 0.5;0600, 39.0;1200, 59.0;1800 | ITM | Traffic jams and minor road accidents reported | 1 m |  |
| 3 May 1986 | Aljunied |  | 51.0;1200 | ITM | 10 uprooted trees or ripped branches | 0.8 m |  |
| *7 September 1986* |  |  | *NA* | *ITM* |  |  | *Boy died after falling in monsoon drain and drowning* |
| 12 September 1986 | Changi, Tampines, Bukit Timah, Commonwealth, Scotts, Geylang, Balestier, Tiong Bahru | Kim Chuan Road – 108mm (2h) | 99.0;0600 | ITM | Traffic jams reported | 1.5 m |  |
| 1 January 1987 | Tampines, Playfair | 80mm (almost 1 day) | NA | NE |  | 1 m |  |
| 10 January 1987 |  |  | 50.0;0000, 68.0;0600, 11.0;1200, 3.0;1800 | NE |  |  | Boy drowned after falling in drain |
| 6-12 January 1987 (intermittent rain) | Pasir Panjang, Towner, Dorset Road, Thomson, Stevens, Balmoral, Dunearn, Newton Circus, Nee Soon, Tampines | 7th day of intermittent rain One day -127mm rain 324mm (7days) Pierce Reservoir - 159mm (11th Jan) | NA | NE | Traffic jams reported and mudslides in Tanjong Pagar | 0.7 m |  |
| 5 March 1987 | Newton Circus, Jalan Besar, Tanjong Pagar |  | 2.0;1200, 14.0;1800 | ITM | Traffic jams reported |  |  |
| 13 November 1987 | Tanjong Pagar, Dunearn, Bukit Timah, Stevens, Commonwealth, River Valley, Outram, Lower Delta |  | 4.0;0000 | NE | Traffic jams reported | 0.6 m |  |
| *22 & 23 December 1987* | *CBD, Katong* |  | *NA* | *NE* |  | *0.15 m (22nd) 0.25 m (23nd)* |  |
| 19 February 1988 | Boat Quay, Havelock, Mountbatten, CBD |  | 0.5;0000 | ITM |  | 0.15 m |  |
| 3 March 1988 | Bukit Timah, Farrer Road | 2h heavy rainfall | 8.0;0600, 3.0;1200 | ITM | Traffic jams reported |  |  |
| 13 May 1988 | Bukit Timah, Newton, Choa Chu Kang, Dunearn, Jurong, Tanglin, Scotts, Chin Swee, Commonwealth, Buona Vista, Balmoral, Nelson | Tengah – 231.8mm  (5h rainfall) | 9.0;0000 | ITM-Slow-moving Sumatra | Traffic jams reported; Business was affected – people came late for work People were evacuated from homes Postponed exams | 0.75 m |  |
| 16 May 1988 |  | Sembawang -33.4mm  (4h rainfall) | 0.3;0000, 17.0;0600 | ITM slow-moving Sumatra squall |  | 0.45 m |  |
| 5 July 1988 | Bukit Timah, Adam Road, Nee Soon, Geylang, Dunearn, Tampines | 50-60mm | 51.0;0000, 1.0;1200 | SW | Traffic jams reported; Halt in public transport services in affected areas. | 1.2 m |  |
| 11 July 1988 | Bukit Timah, Dunearn, University Road, Stevens, Swiss Club Road, Balmoral Road | Sembawang – 21.6mm Changi - 97.3mm | 45.0;0000, 53.0;0600, 5.0;1200 | SW | Traffic jams reported | 0.5 m |  |
| 12 October 1988 | Orchard |  | 6.0;0000 | ITM - Sumatra | Damage to shops from flood waters |  |  |
| 18 January 1989 | Adam, Bukit Timah, Braddell, Balestier | Paya Lebar – 94.9mm (8h) 6h continuous rain | 0 | NE | Traffic jams reported; Stranded people | Knee-high |  |
| 2 March 1989 | Bukit Timah |  | 6.0;0000, 5.0;1200 | ITM | Traffic jams and stalled vehicles reported | 0.5 m |  |
| 13 April 1989 | Bukit Timah | Seletar – 44mm Changi - 19mm | 17.0;0000, 2.0;0600 | ITM | Traffic jams reported Thousands of stranded people |  |  |
| 12 November 1989 | Whitley Road, Pan-Island Expressway (PIE) beside the Police Academy, junction of Balestier Road an d Ah Hood Road. |  | NA | NE | Traffic jams reported | 0.25 m |  |
| 30 November 1989 |  | Paya Lebar - 142.7mm (7h) | NA | NE | Traffic jams reported |  |  |
| 1 December 1989 | Whitley Road |  | 14.0;0000, 19.0;0300, 3.0;0600, 3.0;0900, 0.7;1200, 1.0;1500, 9.0;1800, 0.3;2100 | NE | Traffic jams and fallen trees reported |  |  |
| 10 October 1990 | no flood reported | Sembawang – 73mm (2h) | NA | ITM | Falling branches from trees |  |  |
| 30 March 1991 | Kampong Bahru Road, Temple Street and Hill View Road | 220mm | NA | ITM | Submerged cars in basement lots |  |  |
| 15 November 1991 | Satay Club |  | NA | NE |  | Ankle-deep |  |
| 21-22 December 1991 | Adam Road, Lornie Road | Non-stop rain | 6.0;0300, 7.0;0600 0.3;0300, 0.5;0600, 4.0;0900, 16.0;1500, 7.0;1800, 4.0;2100 | NE | Traffic jams reported | Calf level |  |
| 23 December 1991 | Adam Road |  | NA | NE |  | Calf level |  |
| 28 December 1991 | Toa Payoh, Bishan, Jalan Bahagia, Braddell, other areas |  | 12.0;0900 | NE | Flooded roads, fallen tree reported | Knee-deep |  |
| 17 February 1992 | Bedok |  | NA | ITM | Mudslide reported |  |  |
| 19 June 1992 | Adam road | 64mm (2.5h) | 0.4;0000, 24.0;0300 | SW -Sumatra squall | 200 trees reported fallen People injured when trees fell on cars |  | Injuries reported |
| *11 November 1992* | *Old Airport Road, Meyer Road, Braddell, Adam, Geylang* | *Continuous rainfall for 21hrs Seletar - 247.8mm (21h)* | *30.0;0000, 22.0;0300, 59.0;0600, 41.0;0900* | *NE* | *Submerged cars in underground carpark 13 reported traffic accidents and 2 fallen trees* | *Knee-deep* | *2 deaths* |
| *21 December 1992* | *Bukit Timah* |  | *40.0;0000, 14.0;0900* | *NE* |  |  |  |
| 5 June 1993 | Queen's Road, the slip road from Clementi to the Ayer Rajah Expressway (AYE), Commonwealth Avenue, Nassim Road and Orchard Road, in front of MacDonald House |  | NA | SW |  |  |  |
| 26 August 1993 |  | 5hr storm | 5.0;0000, 47.0;0300, 7.0;0600 | SW | Traffic jams and two traffic accidents reported |  |  |
| 1 December 1993 | Alexandra Road’s carpark, Paya Lebar, Yio Chu Kang, Jervois Road | Paya Lebar – 39.5mm | 0.3;0000 | NE | Carpark has been hit by flood before but in the middle section. Usually floods at middle section | 1 m |  |
| 2 December 1993 | Margaret Drive, River Valley, Havelock, Alexandra |  | 2.0;0900, 8.0;1200 | NE | Cars were flooded | 0.5 m |  |
| 4 February 1995 |  | 159.3mm | 0.4;0000, 3.0;0300, 6.0;0600, 8.0;0900, 54.0;1200, 27.0;1500, 27.0;1800, 16.0;2100 | ITM | Attendance was down at Chingay parade |  |  |
| 2 July 1995 | Several parts of the island, including the Central Expressway (CTE). |  | NA | SW |  |  |  |
| 5 July 1995 | Jervois Road, Lavender, Tiong Bahru, Nile Road, Margaret Drive, Pagoda Street | 47.8mm (6h) 4th day of continuous rain | 23.0;0000, 11.0;0300 | SW | Traffic jams reported Fallen trees and soil erosion at River Valley | 0.5 m |  |
| 27 July 1995 | City Area, Jurong, Lim Chu Kang, Tanglin, Queenstown, Margaret Drive | Tengah - 96mm | 7.0;0600, 4.0;0900 | SW | 60 Houses flooded at Margaret Drive | Waist-high |  |
| 2 February 1996 | Bukit Timah | Paya Lebar - 40mm (1h) | NA | ITM | Several car accidents reported |  |  |
| 1 July 1996 | Opera Estate |  | NA | SW | Flooded houses – belongings destroyed | 0.2 m |  |
| 17 April 1996 | Central Singapore | 2.5h  Lightning | NA | ITM | Strong surface winds affected some areas, including Toa Payoh, Moulmein, Balestier, Whitley and Thomson 3 cars damaged from falling trees; 22 fallen trees |  | 2 injuries |
| 24 October 1996 | Changi, Paya Lebar, Seletar and in the city area. | 2.5h  14-32mm | 9.0;0000 | ITM-Sumatra squall |  |  |  |
| 25 February 1997 | Opera Estate, Bedok | 1h rainstorm | 27.0;1200 | ITM | Blackout  Worst flood for the residences in 20 years  Flooded houses with damaged belongings | 0.5 m |  |
| 4 March 1997 | Opera Estate | 2h rainfall | NA | ITM | Flooded houses with damaged belongings | Knee-deep |  |
| 2 April 1997 | Marina Station | Sembawang – 27.6mm | 12.0;0300; 3.0;0600 | ITM | Fallen trees reported | 0.25 m |  |
| 4 December 1997 | Ulu Pandan Canal | Heavy rain | 1.0;0300, 14.0;0600 | NE |  |  | Boy swept into overflowed monsoon drain |
| 5 May 1998 | Amberville |  | 27.0;2100 | ITM | Cars were completely flooded with water | 0.3 m |  |
| 12 July 1998 | Tanjong Katong, Changi , Marine Parade | 165mm (3.5h) 102mm (50min from 1.10pm to 2pm) | 34.0;0600, 0.1;0900 | SW |  | 0.35 m |  |
| 9 September 1998 | Singapore River, Kim Seng, Jiak Kim Street |  | NA | ITM |  |  |  |
| 7 December 1998 | Chinatown |  | 4.0;0900 | NE | Traffic jams reported |  |  |
| 6 January 1999 | Chinatown |  | 10.9;0100, 0.7;0900 | NE | Business goods were damaged |  |  |
| 23-25 December 1999 | Boat Quay , Chinatown, City Area, East Coat Park, eastern Singapore | No rain | 0.7;1200, 1.0;2100 4.0;0000, 3.0;0300, 0.3;0600 3.6;0000, 0.3;1500, 0.3, 1800 | NE | Shops next to the river were flooded and other areas as well  Bumboat businesses were disrupted |  |  |
| 21 January 2000 | Pagoda St, Stadium Rd |  | 0 | NE |  | 0.03 m |  |
| 6 April 2000 | Braddell, Upper Thomson, Jurong, Bukit Timah | 166mm (1.5h) | 0.7;0300, 1;0600, 0.7;1800, 1.3;2100 | ITM- "1-in-100 yr storm" |  |  | Woman fell into a drain(death) and the man was swept away in a flooded canal(missing) |
| *22 November 2000* | *Changi, Preston Road, Serangoon, Chinatown, Jervois Road* | *2 Tropical storms* | *0.1.0000, 0.5;0300, 4;0600, 0.6;0900, 31;1500, 10;1800, 0.3;2100* | *NE* | *Landslides reported; 29 uprooted or severely damaged trees* |  |  |
| 19 December 2000 | Jervois Road, River Valley |  | 11.9;0000, 11.9;0300,11.9;0600, 2.5;0900, 0.7;1200 | NE | Traffic jams and stalled vehicles reported | Waist-high |  |
| 10 February 2001 | Stadium Road | No rain | 21.1;0000, 21.3;0300, 18.5;0600, 0.7;0900, 0.7;1500, | ITM |  | Ankle-deep |  |
| 2 December 2001 | Yio Chu Kang |  | 8;0900, 8.6;1500, 8.6;1800, 8.6;2100 | NE, "1 in 10 yr storm" | Residential terrace house roofs collapsed |  |  |
| 7 April 2002 | Kranji | Heavy rainfall Opening of tidal gates | 0 | ITM |  |  | 3 people possibly drowned at the beach – washed into the sea when the tide came in |
| 8 March 2004 | Bukit Timah, Victoria Street, Upper Pickering Street, Boat Quay |  | 0.2;0000,1;0300,25;0600, 4;0900,17;1200,47;1500,17;1800,13;2100 | ITM | Businesses were severally affected traffic jams reported | 0.3 m |  |
| *10 March 2004* | *Paya Lebar, Telok Kurau, Geylang* | *90mm (1h)* | *0* | *ITM* | *Basement carpark submerged* |  |  |
| *30 March 2004* | *Jurong* | *Jalan Behar - 28mm Ulu Pandan - 80mm* | *3;0900* | *ITM* | *Entire industrial area was flooded uprooted trees* |  |  |
| *3 April 2006* | *Bedok* |  | *11;1200* | *ITM* | *22 bus services were diverted* | *1 m* |  |
| *14 April 2006* | *Chin Cheng Avenue, Bedok* | *75mm (2h)* | *0.4;0300;8;0600;22;0900,* | *ITM* | *13 vehicles & 10 buses stalled* | *Up to van windscreen* |  |
| 10 June 2006 | Punggol |  | 0.1;0600, 0.1;1200,0.1;1500,0.7;1800,0.2;2100 | SW |  | Ankle-deep |  |
| 1-14 June 2006 | Western Singapore - Tuas, Jurong | 225mm to 315mm | NA | SW |  |  |  |
| 14 July 2006 | Commonwealth |  | 17;0300 | SW | “Ponding” occurred | Car wheel depth |  |
| 15 September 2006 | Commonwealth, Cuscaden Road |  | 1;0300,2.9;0600,2;0900,0.2;1200,0.1;1500, | ITM | Stalled vehicles | Car wheel depth |  |
| *19 December 2006* | *Buangkok, Thomson Road* | *Yio Chu Kang - 345mm (20h)* | *13;0000,50;0300,48;0600, 26;0900,11;1200,18;1500,37;1800,8;2100* | *NE* | *Traffic jam reported Landslides at Mandai and Bukit Batok, several fallen trees* | *Waist-deep* |  |
| *18 January 2007* | *Kampong Bahru Road, Commonwealth Avenue, Cuscaden Road* | *Sentosa - 121mm (3.5h @ 7pm)* | *11;0900,0.1;1500* | *NE* | *Massive traffic jams reported; numerous stalled vehicles* | *Knee-deep* |  |
| 19 January 2007 | Commonwealth, junction of Tomlinson Road and Cuscaden Road |  | 0 | NE | 5 cars, 1 taxi, 1 van stalled | Knee-deep |  |
| 21 January 2007 | Commonwealth |  | 0 | NE |  |  |  |
| 22 April 2007 | Bukit Batok |  | 2;0900 | ITM |  |  | Girl drowned after she was washed away in a canal. |
| 23 April 2007 | Sembawang |  | 0.1;0900 | ITM | Flooding of 3rd and 4th floor school classroom Power supply cut off on 4th floor of school |  |  |
| *3 May 2007* | *Shenton Way* | *Prince Edward Rd - 69.6mm* | *4;0300,2;0600,1;0900* | *ITM* |  | *Ankle-deep* |  |
| 19 July 2007 |  | Ulu Pandan -137mm (1h) | 23;0300,0.1;0600, | SW |  |  |  |
| 28 August 2007 | Commonwealth Avenue, Ganges Avenue, King's Road, Balmoral Road, Arcadia, central Singapore | central Singapore - 143mm in 7hrs | 0.2;1500 | SW |  |  |  |
| *28 November 2007* | *Orchard, Lower Delta Road, Jalan Besar, Indus Road, Tiong Bahru, open-air carpark opposite Delta House and Liat Towers* | *Somerset - 99mm (2.30-5pm)* | *4;0900,0.6;1200* | *NE* |  | *Knee-deep* |  |
| *3 April 2008* | *Dunearn Road , Upper Paya Lebar and Commonwealth Avenue* | *Jurong Pier Road - 126mm (4.20-6pm)* | *2;1200* | *ITM* |  |  |  |
| 9 August 2008 | Orchard Road |  | 11;0900,14;1200 | SW |  |  |  |
| 26 September 2008 | Cross Street, Orchard Road, Cuscaden Road, Tiong Bahru |  | 31;0000,0.4;0300,2;0600 | ITM | Uprooted trees reported | 0.5 m |  |
| 15 March 2009 | Jurong East |  | 15;0900 | ITM- storm | Uprooted trees reported |  |  |
| 19 November 2009 | Bukit Timah | Bukit Timah - 110m (total) NP - 121mm (12.30-3.20pm) | 40;0600,19;0900,2;1200 | NE | Traffic jams reported and basement carparks flooded | Knee-deep |  |
| *20 November 2009* | *Bukit Timah* | *Bukit Timah -92mm (1.20-1.50pm) 110mm (1-3pm)* | *13;0600,4;0900* | *NE "1 in 50 yrs flood"* |  | *Knee-deep* |  |
| *16 June 2010* | *Orchard, Bukit Timah* | *Two peaks at 9.15am and 10.30am. 100mm in 3hrs Orchard - 101.6mm (2h) Sentosa - 115mm (2h)* | *25;0000,25;0300,13;0600,0.4;0900* | *SW* | *Shops had merchandise destroyed, millions lost 100 cars flooded in basement; traffic jams and fallen tree reported Power cut People had to move out temporarily* |  |  |
| *25 June 2010* | *Bukit Timah, Thomson, Bukit Java, Geylang, MacPherson Road, Old Airport Road* | *100mm (1h)* | *8;0000,26;0300,0.1;0600* | *SW Sumatra squall* | *Traffic jams reported 25 fallen trees* | *Knee-deep* | *Injured people from trees falling on cars* |
| 1 July 2010 | MacPherson and Tai Seng |  | 0.4;1500 | SW |  |  |  |
| *17 July 2010* | *Braddel, Joo Chiat, Changi, Bukit Timah, Cluny Court basement carpark* | *Central 181mm (total) Eastern 194mm (total) Lower pierce Reservoir - 114mm (1h) Poole Road - 194mm (1h)* | *110;0000,4;0300, 0.1;1800* | *SW (during Typhoon Conson)* | *Power cuts & Merchandise damaged at shopping mall* | *0.7 m* |  |
| *30 January 2011* | *Eastern Singapore* | *216 mm (MSS) Pulau Ubin - 200.8mm Changi -178mm* | *3;0000,100;0300,65;0600,6;0900,3;1200,9;1500,13;1800,8;2100* | *NE* |  | *Shin-deep* |  |
| *4 May 2011* | *Bishan St 13 , Ang Mo Kio Ave 1, Yio Chu Kang* | *100mm (total)  Bishan Street 13 - 90 (1h from 3 to 4pm)* | *16;0900,2;1200* | *ITM* |  | *Knee-deep* |  |
| 1 June 2011 | Balestier |  | 0.2;0900 | SW |  |  | Student fell into a non-barricaded drain |
| *5 June 2011* | *Tanglin, MacPherson, orchard, Bukit Timah, Moulmein* | *Central - 124mm (4h) 5h storm  65mm (30min)* | *53;0000,17;0300,6;0600,1;0900,0.2;2100* | *SW* | *Retail malls in Tanglin were flooded* | *0.1 m* | *Drain where boy from previous flood drowned, overflowed* |
| 9 June 2011 | Jurong East and Choa Chu Kang |  | 1;0000,0.2;0300 | SW |  |  |  |
| 12 June 2011 | Tanglin |  | 0 | SW | Tanglin Mall flooded | Ankle-deep |  |
| *21 October 2011* | *Slip road from Kranji Expressway (KJE) to Woodlands Road, Ang Mo Kio, Little India, Serangoon* | *2hr heavy rain* | *0* | *ITM* | *flooding of shops, one shop lost $800 of new shirts from rain water* |  |  |
| *31 October 2011* | *Woodlands , KJE, Mandai* |  | *10;0600,3;0900,2;1200* | *ITM* | *Traffic jams reported* | *Knee-deep* |  |
| *12 November 2011* | *Basement carpark of Varsity Park Condominium, West Coast , AYE towards the East Coast Parkway (ECP), Pasir Panjang* | *Kent ridge – 91.4mm  Kent ridge - 52.6mm (30min from 1.20 to 1.50pm)* | *0.2,0600, 8;0900* | *NE* |  | *0.3 m* |  |
| *23 December 2011* | *Orchard Road (Liat Towers. Cuscaden Road, Newton Circus, Kampong Java, Lincoln Road, Wee Nam Road, Cambridge Road, junction of Moulmein Road and Thomson Road in front of United Square, and junction of Bukit Timah junction and Sixth Avenue.* | *152.8mm (3h)* | *0.6;0600,0.8;0900,0.4;1200,0.4;2100* | *NE* | *Shops in Liat Towers and Lucky Plaza were severally affected* | *0.3 m* |  |
| *20 January 2012* | *Raffles City, Little India, Thomson, Tanglin* | *Orchard - 67mm (1h from 1.35-2.35pm)* | *11;0900* | *NE* | *Power failure at several malls* |  |  |
| *21 January 2012* | *Bukit Timah, Sengkang, Tampines, Geylang Serai, and the Seletar Expressway (SLE), towards the Bukit Timah Expressway (BKE)* | *2h storm* | *9;0900,3;1200* | *NE ITM* | *Flood collected in businesses and shops Damage to traffic lights at several junctions* | *Knee-deep* |  |
| 27 February 2012 | Ulu Pandan, Clementi |  | 0.4;0000 | ITM | Subsided within 20 minutes |  |  |
| 2 April 2012 | Toh Tuck | 95.2mm | 25;0000,2;0300 | ITM Sumatra squall |  |  |  |
| 10 April 2012 | Eastern and Central Singapore. Lorong Ah Soo |  | 27;0900,7;1200 | ITM |  |  |  |
| *5 May 2012* | *Bukit Timah, Dunearn, KJE slip road in the direction of Woodlands Road, Clementi* | *NP - 68.6mm (30min from 1.40am -2.10am) Rain from 1.30am and 3.10am* | *0.2;0000* | *ITM* |  | *0.25 m* |  |
| *27 September 2012* | *Kim Tian, Tanjong Pagar, Marina South, Temple St, Jalan Bukit Merah, Mount Elizabeth Road, South Bridge Road and New Bridge Road* |  | *24;1200,4;1800,0.2;2100* | *ITM* |  | *Ankle-deep* |  |
| *17 October 2012* | *Ang Mo Kio* | *106mm* | *0.6;0000,4;1200* | *ITM* |  |  |  |
| 31 October 2012 | Southern Singapore | 100.4mm | 1;0600,3;0900 | ITM- Sumatra Squall | Car drifted 50m in Nanyang Technological University |  |  |
| 1 November 2012 | Serangoon, Bukit Timah, Toa Payoh, Orchard |  | 0.2;0600,0.2;1800 | NE |  |  |  |
| 17 November 2012 | Bukit Timah | Afternoon | 0 | NE | Flooded carpark |  |  |
| *13 December 2012* | *Ang Mo Kio* |  | *0.2;0600,55;0900,5;1200,1;1500* | *NE* |  | *0.1 m* |  |
| *2 January*  *2013* | *Woodlands, other areas* | *Thunderstorm* | *7;0000,1;0300* | *NE* |  |  |  |
| 6-7 February 2013 | Rivervale Mall at Punggol East |  | 0.2;0300,0.8;0600,7;0900,2;1200,2;1500 | ITM | Tenants at the mall were severally affected as the entire building was leaking |  |  |
| 8 February 2013 | Rochester, NUS, AYE, PIE, Commonwealth | 1.5h rain | 3;0600,6;0900,2;1200 | ITM |  | Knee-deep |  |
| *17 April 2013* | *Geylang, Tampines, Mount Faber, Whampoa and Holland* | *6h thunderstorm* | *22;0000,1;0300* | *ITM Sumatra squall* | *People were late for work due to severe delays from rail network 1 damaged car & fallen trees reported* |  |  |
| *28 April 2013* | *Eastern Singapore* |  | *14;0300,2;0600* | *ITM* | *Partially submerged cars* |  |  |
| *5 September 2013* | *AYE, Clementi, Commonwealth, Kent Ridge – National University of Singapore* | *Kent Ridge - 102.8mm (90min)  119.2mm before noon Holland Rd - 122mm 82.2mm (35min)* | *23;0300,2;0600,0.2;0900,19;2100* | *ITM* | *5 fallen trees and traffic jams reported* | *0.5 m* |  |
| *15 October 2013* | *PIE towards Changi near the Tampines Avenue 5 exit, Paya Lebar* | *5hr Thunderstorm* | *59;0000,13;0300* | *ITM* | *Pasir Ris Polyclinic - where two ceiling boards collapsed after a build-up of water.  Changi Airport – leaking and soaked carpets* |  |  |
| *20 October 2013* | *Paya Lebar Road, the Service Road off Upper Paya Lebar Road, Arumugam Road, Ubi Ave 2 and Eunos Crescent, Thomson, PIE at Stevens rd exit, Macpherson* | *Kim Chuan -77 mm (2.333h from 4.20pm to 6.40pm)  Kim Chuan -60.2mm (30 min from 5.05pm)* | *0.4;0600,24;0900,9;1200,* | *ITM* |  |  |  |
| *28 October 2013* | *New Upper Changi Road, Chai Chee Road, Marine Parade* |  | *0* | *ITM* |  |  |  |
| *30 October 2013* | *AYE after the Alexandra, Thomson, Dunearn, Cambridge, Tiong , New Upper Changi Road, Chai Chee Road, Marine Parade* | *Ping Yi Secondary School in Chai Chee - 54mm (12.30 - 1.30pm) Ping Yi Secondary School in Chai Chee - 48mm (12.30-1pm)* | *9;0600* | *ITM* | *Marine Parade Market and Food Centre reeked of a foul smell when its toilets overflowed and dirty water mixed with the floodwaters Stalled vehicles and traffic jams reported* | *0.1 m* |  |
| 3 November 2013 | Chai Chee |  | 0 | NE |  |  |  |
| *4 November 2013* | *Clementi, Commonwealth, Bukit Timah* | *Ngee Ann Polytechnic - 86.6mm (3pm to 4.40pm) NP - 51.8mm (3.30pm to 4pm)* | *4;0600,15;0900,0.4;1200* | *NE* |  |  |  |
| 24 November 2013 | Chai Chee/ New Upper Changi Road |  | 0.8;0600,0.8;0900, | NE |  |  |  |
| 30 November 2013 | Boon Lay, Chai Chee |  | 0.2;0900,21;1200,2;1500 | NE |  |  |  |
| *9 July 2014* | *Commonwealth, KJE slip road to Woodlands Road, Ang Mo Kio, Mandai* | *5h storm Mandai - 96.8mm (1h peak)* | *11.0;0000, 2.0;0300* | *SW* | *Fallen trees reported* |  |  |
| *29 July 2014* | *Mackenzie Road near Little India, Kramat Lane behind Concorde Hotel along Orchard Road and Bassein Road near Tan Tock Seng Hospital in Novena* | *Hardy Road -95.4mm (2.10pm to 4pm)  Hardy Road -49.4mm (2.30 to 3pm)* | *19.0;0600, 10.0;0900* | *SW* | *Reduced haze in Singapore – storm & wind direction  Toppled trees & falling branches – fell on car injuring people Traffic jam reported* |  |  |
| *4 October 2014* | *Boon Lay, Buangkok* |  | *4.0;0300, 2.0;0600* | *ITM* |  | *0.1 m* |  |
| *8 November 2014* | *Dunearn, Lorong Kismis* |  | *23.0;000, 0.2;0300, 20.0;1500, 4.0;2100* | *NE* |  | *0.2 m* |  |
| *13 November 2014* | *Yishun, Macpherson, Harvey Road, Lorong Gambir, Lorong Ong Lye* |  | *0.2;0900, 63;1200, 0.4;1500* | *NE* |  | *0.2 m* |  |
| *17 November 2014* | *Hougang, Tampines, Macpherson , Lorong Gambir, Lorong Ong Lye , Kovan* | *Paya Lebar - 62.6mm @ 5pm* | *0.3;1200* | *NE* | *Car park was flooded  Damage to property when homes were flooded* | *0.3 m* |  |
| 20 November 2014 | Bukit Batok | Storm | NA | NE | 2 branches fell and crushed a lorry |  |  |
| *26 November 2014* | *Sunset Drive* |  | *38.0;0900, 0.2;1200, 0.8;1500* | *NE* |  | *0.15 m* |  |
| *17 December 2014* | *Commonwealth, Enterprise Road* |  | *18.0;1200* | *NE* |  | *0.2 m* |  |
| *24 April 2015* | *Lornie Viaduct* |  | *1.0;0900, 0.2;1200* | *ITM* |  | *0.1 m* |  |
| *28 April 2015* | *Marine Parade, Chai Chee* | *88mm* | *0.2;0000* | *ITM* |  |  |  |
| *8 June 2015* | *Chin Bee Ave, Boon Lay way* |  | *NA* | *SW* |  | *0.3 m* |  |
| *11 August 2015* | *Nanyang Technological University- North Spine (1 40pm), Tampines Street 32 (215am)* |  | *trace at 0600, 36; 9am* | *SW* | *North Spine area flooded/ponding Void decks flooded* | *Rose above road kerb* |  |
| *9 September 2015* | *Jurong West Street 51* |  | *7.1;0600, 10.9;0900* | *ITM* | *Stores flooded between noon and 1 pm* | *0.1 m* |  |
| *5 December 2015* | *Ang Mo Kio, Buangkok, Hougang and Yio Chu Kang* |  | *6.0;1800* | *NE* | *Stalled vehicles reported* | *1 m* |  |
| *10 December 2015* | *Toa Payoh, Boon Keng, Maxwell Road, slip road to Airport Boulevard on the PIE* |  | *40.1;1800* | *NE* | *Roads flooded* |  |  |
| *11 December 2015* | *Boon Keng, Bendemeer, Thomson, Balestier, Bishan* |  | *11.0;1500* | *NE* | *Roads and Shopping mall flooded* | *Ankle deep* |  |
